# Supplementary material for: Chimeric Capsid Proteins Impact Transduction Efficiency of Haploid Adeno-Associated Virus Vectors
Source: MDPI journal article supplement (doi:10.3390/v11121138), 2019-12-09
Supplement: s1 [file s1]

Supplementary Table 1. The list of the primers

| Production    | Direction | Sequence (5'-3')                                         |
|---------------|-----------|----------------------------------------------------------|
| pXR2vp3       | Forward   | GAT TTA AAT CAG GT <b>CTG</b> GCT GCC GAT GGT TAT CTT CC |
|               | Reverse   | GG AAG ATA ACC ATC GGC AGC CAG AC CTG ATT TAA ATC        |
|               | Forward   | GGA ACC TGT TAA G <b>GCG</b> GCT CCG GGA AAA AAG         |
|               | Reverse   | CTT TTT TCC CGG AGC CGC C TTA ACA GGT TCC                |
| pXR3vp3       | Forward   | GAT TTA AAT CAG GT <b>CTG</b> GCT GCT GAC GGT TAT CTT CC |
|               | Reverse   | GG AAG ATA ACC GTC AGC AGC CAG AC CTG ATT TAA ATC        |
|               | Forward   | GAG GAA GCA GCT AAA <b>GCG</b> GCT CCT GGA AAG AAG       |
|               | Reverse   | CTT CTT TCC AGG AGC CGC TTT AGC TGC TTC CTC              |
| pXR8vp12      | Forward   | GTG GGA CCT AAT ACA <b>CTG</b> GCT GCA GGC GG            |
|               | Reverse   | CC GCC TGC AGC CAG TGT ATT AGG TCC CAC                   |
|               | Forward   | CGG TGG CGC ACC A <b>CTG</b> GCA GAC AAT AAC             |
|               | Reverse   | GTT ATT GTC TGC CAG T GGT GCG CCA CCG                    |
| pXR9vp12      | Forward   | GTG GGA TCT CTT ACA <b>CTG</b> GCT TCA GGT GGT CC        |
|               | Reverse   | CC ACC ACC TGA AGC CAG TGT AAG AGA TCC CAC               |
| VP12-2N8C     | Forward   | CTCTGGTCTGGGAACTAATACGATGGCTGCAGGCGGTGGCG CACC           |
|               | Reverse   | GTGCGCCACCGCCTGCAGCCATCGTATTAGTTCCCAGACCAG AGG           |
| AAVcap        | Forward   | CTCATTTAAATCAGGTATGGCTGCCGATGGTTATCTTCCA                 |
|               | Reverse   | GTTTAGCGGCCGCGACACCAAAGTTCAACTGAAACGAAT                  |
| 2VP12-8VP3Mut | Forward   | CTCTGGTCTGGGAACTAATACGCTGGCTGCAGGCGGTGGCGC ACC           |
|               | Reverse   | GTGCGCCACCGCCTGCAGCCAGCGTATTAGTTCCCAGACCAG AGG           |

---

---
